# Supplementary material for: Structure and exchange in silicon-linked tetraradicalsElectronic supplementary information (ESI) available: EPR spectra, X-ray crystallographic data and packing views, synthetic and characterization details for 1a and 2, χT plot for 2, and computational summaries for model systems. See http://www.rsc.org/suppdata/cc/b1/b107430j/
Source: Royal Society of Chemistry journal article supplement (doi:10.1039/b107430j), 2002-01-14

Supporting Materials

**Structure and Exchange in Silicon-Linked Tetraradicals.**

by

Yi Liao,a Martha Baskett, Paul M. Lahti*a andFernando Palaciob

aDepartment of Chemistry, University of Massachusetts, Amherst, MA 01003

*bInstituto de Ciencia de Materiales de Aragón, CSIC – Universidad de Zaragoza, 50009 Zaragoza SPAIN*

**SYNTHESIS OF TETRARADICAL 1a.**

**Synthesis of tetrakis(*N*-oxyl-2,2,6,6-tetramethylpiperidin-4-yl)silane (1a).**. Using the method of Gruzinova et al. [E. A. Gruzinova, A. K. Litkovetz and E. V. Gruzinov, *Russian Chemical Bulletin*, 1995, **44**, 956-957], freshly distilled pyridine (190 microliters, 2.32 mmol) was added via syringe to a stirring solution of 4-hydroxy-2,2,6,6-tetramethylpiperidinoxy (TEMPO, Aldrich, 0.40 g, 2.32 mmol) in dry ether (10 mL) at 0 oC under argon. A solution of silicon tetrachloride (0.09 g, 0.581 mmol) in dry ether (2 mL) was placed under argon in a small addition funnel and added dropwise to the stirring solution over 25 min. The mixture was allowed to warm slowly to room temperature over 8 h, and stirred for a further 12 h. The resulting mixture was filtered through Celite. The filtrate was concentrated under vacuum to afford 0.26 g of red oil (62%), which was recrystallized from hexanes to give blocky red crystals with mp 140-142 C (lit mp 1601 C, A. Nakajima, H. Ohya-Nishiguchi, and Y. Deguchi, *Bull. Chem. Soc. Japan*, 1971, **44**, 2120-2123). Anal. Calcd. For C36H68N4O8Si: C, 60.64; H, 9.61; N, 7.86; O, 17.95; Si, 3.94. Found: C, 60.83; H, 9.77; N, 7.65. ESR (2-methyltetrahydrofuran, room temp, 9.630 GHz, 100 kHz modulation frequency, 1.01 G modulation amplitude): nonet (Hpp= 3.97 G). Crystallography: Red needle 0.55  0.55  0.55 mm; monoclinic space group P-1 (#2), with *a* = 19.0646(3) Å, *b* = 11.8693(2) Å, *c* = 19.1899(3) Å,  = 100.5005(11)º, *V* = 4269.64(12) Å3, *Z* = 4, Dcalc = 1.109 g/cm3; 7471 unique reflections with I > 2(I) were modeled with 442 parameters to yield the structure with R = 0.056, wR = 0.135.Mo-K = 0.7107 Å, Mo-K = 0.10 mm-1 . The TEMPO-O-Si dihedral is disordered.

**Fig. 1S** / Synthesis of tetraradical **1a**.

**SYNTHESIS OF TETRARADICAL 2.**

**Synthesis of tetrakis(4-bromo-phenyl)silane (3S).** A solution of 6.0 g (25.4 mmol) of 1,4-dibromobenzene in 80 mL of diethyl ether was treated with 10.7 mL of a 2.5 N solution of n-butyllithium in hexane (26.8 mmol) at –78 oC under argon. After 1 h, a solution of 1.08 g (6.35 mmol) of SiCl4 in 3 mL of hexane was added. After being stirred for 90 min, the reaction was warmed to 0 oC, then stirred for another 45 min. To this solution, was added 1.5 mL of water. The solvent was evaporated under reduced pressure. The remaining white solids was washed with water, methanol and a little 1:1 CH2Cl2:methanol. The crude product was dissolved in CH2Cl2. Adding methanol to the solution yielded 2.95 g (71% yield) of **5** as a white precipitate, mp 224-226 ºC, [lit mp 236-239 ºC, B. Kirste, W. Harrer and H. Kurreck, *Angew. Chem*., 1981, **93**, 912-913]. 1H NMR (CDCl3, 300 MHz)  7.336 (d, J = 8.31 Hz, 8 H), 7.536 (d, J = 8.31 Hz, 8 H).

**Synthesis of tetrakis(4-*N*-tert-butyl-*N*-aminoxylphenyl)silane (4S).** To a suspension of 0.3 g (0.46 mmol) **3S** in 8 mL of diethyl ether was added 0.267 g (2.30 mmol) of *N, N, N’, N’*-tetramethylethylenediamine. The mixture was cooled to –78 oC, and then added 1.76 mL of a 1.6 N solution of n-butyl lithium in hexane (2.8 mmol) under argon. After being stirred for 90 min, the mixture was warmed up to room temperature and stirred for another 90 min. The mixture was cooled to 0 oC. Then a solution of 0.28 g (3.22 mmol) of 2-methyl-2-nitrosopropane in 0.5 mL of diethyl ether was added. The mixture was stirred overnight at ambient temperature under argon, then treated with 2 mL of saturated aqueous ammonium chloride solution. The organic layer was separated and the aqueous layer was extracted with diethyl ether (3 × 5 mL). The organic layers were combined and concentrated under reduced pressure. Addition of hexane yielded a white precipitate that was washed with ethyl acetate and diethyl ether to yield the crude hydroxylamine. The hydroxylamine was both moisture and air sensitive, so it was used directly to prepare the nitroxide. The white solid was dissolved in 15 mL of freshly distilled diethyl ether, then 0.68 g (2.84 mmol) of lead dioxide was added. After being stirred for 4 h, the solution was isolated from lead dioxide by filtration. The filtrate was concentrated under reduced pressure and chromatographed through a silica gel column with 3:2 hexane:ethyl acetate. The resultant reddish orange solid was recrystallized by dichloromethane/heptane to yield 72 mg of **3S**  (23% overall yield from **5**) as red crystals, mp 211-212 ºC. IR (KBr, cm-1) 1106 (no OH stretch observed). Anal. Calcd. for C40H56N4O4Si: C, 70.14; H, 8.24; N, 8.18. Found: C, 69.77; H, 8.37; N, 7.37. ESR (toluene, room temp, 9.647 GHz, 100 kHz modulation frequency, 1.07 G modulation amplitude): nonet (Hpp= 2.87 G). Crystallography: Red needle 0.15  0.20  0.65 mm; tetragonal space group P42/n (#86), with *a* = 16.661(0) Å, *b* = 16.661(0) Å, *c* = 7.058(6) Å, *V* = 1959.3(4) Å3, *Z* = 2, Dcalc = 1.154 g/cm3; 518 unique reflections with I > 3(I) were modeled with 54 parameters to yield the structure with R = 0.246, wR = 0.218.The large R-value is due to rotational disorder of the phenyl-nitroxide torsional angle.

**Fig. 2S** / Synthesis of tetraradical **3**. a – n-BuLi/hexane/Et2O

at –78 C, then add 0.25 equiv of SiCl4; b – n-BuLi/hexane/

Et2O/TMEDA at –78 C, then add 7 equiv of Me3C-N=O;

c – PbO2/ Et2O/room temp, 4 h.

**Fig. 3S** / Room temperature ESR spectrum of **2** in toluene at

9.79 GHz (upper), and 77 K ESR spectrum of **2** in toluene

at 9.4 GHz (lower); inset is the half-field region for the 77 K

spectrum.

**Figure S4a**. Crystal packing in **1a** in *ab*-plane.


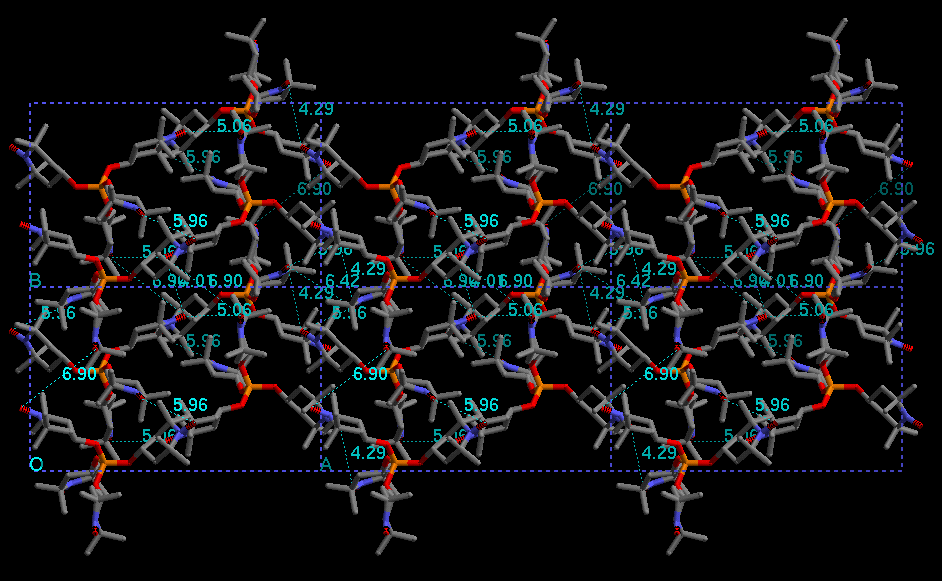


**Figure S5**. Crystal packing in **1a** in *bc*-plane.


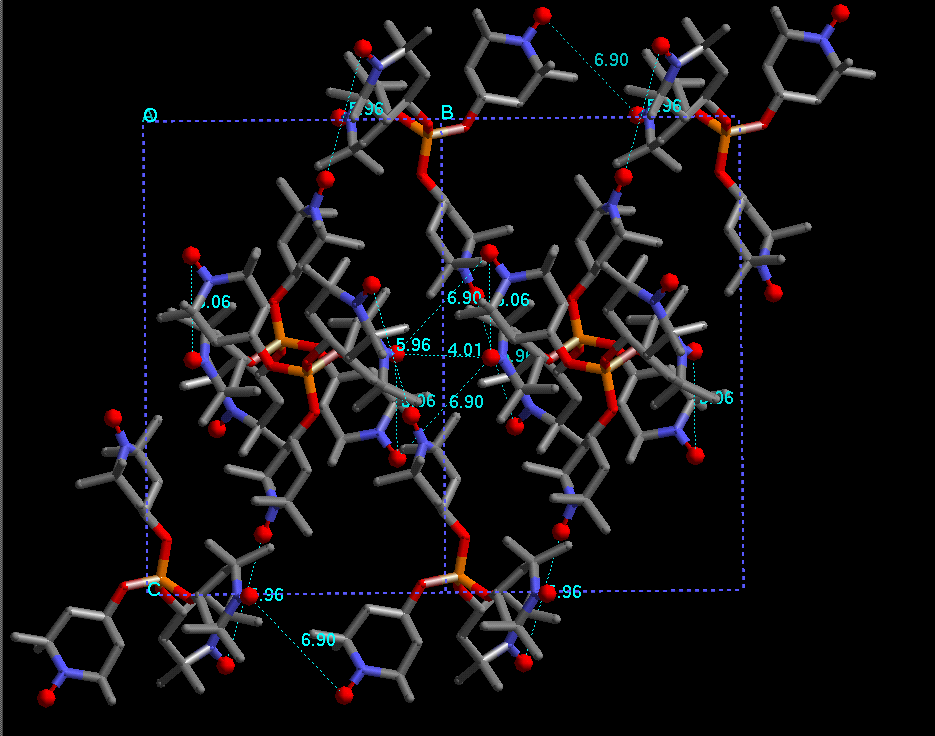


Pictures and distance measurements generated using Acelerys Cerius2 software for SGI computer with CIF file for compound **1a**.

Crystal analysis for **1a**: Analysis was carried out on an Nonius KappaCCD using Mo K radiation,  = 0.71073 Å, T = 293 K. Red block 0.55×0.55×0.55 mm. The basic space group is triclinic, P-1 (No. 2), *a* = 19.0646(3), *b* = 11.8693(2), *c* = 19.1899(3) Å,  = 100.5005(11)º, *Z* = 4. N = 7471 reflections were measured using  scans at 4 <  < 25. The structure was solved by direct methods and refined on F2 with a full matrix least squares using SHELXTL97 with 442 parameters; R = 0.056, wR= 0.135. There is disorder about the TEMPO-O-Si dihedral that is not shown in the crystallographic representations.

Selected Molecular Geometry Parameters for **1a**

| r Si-O(2) | 1.60 Å |
| --- | --- |
| rNO | 1.29 |
| r N(O)····N(O) (intra) | >7.94* |
| r N(O)····N(O) (inter) | >4.01* |
| 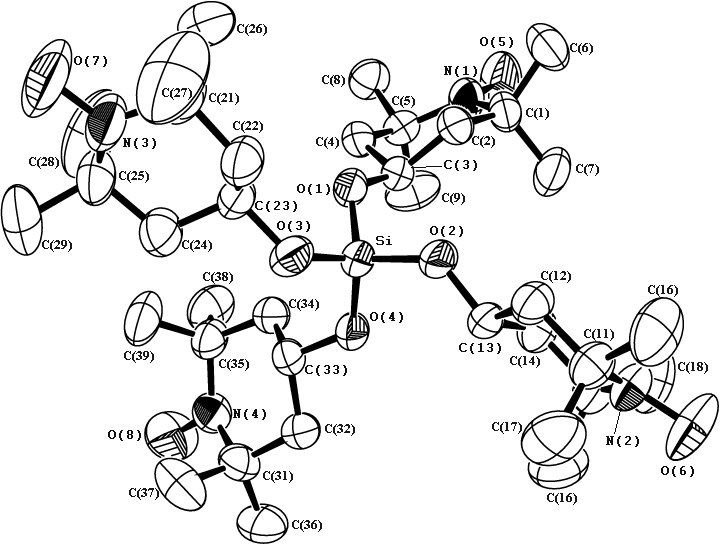Si-O-C | 128.3º |

*Conformer dependent within lattice.

**Figure S6**. Crystal packing in **2** in *ac*-plane (upper) and *ab*-plane (lower). Ph-NO disorder is not shown.

**
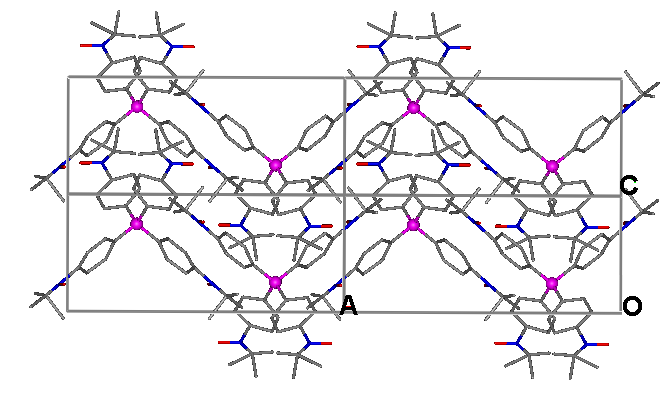
**

**
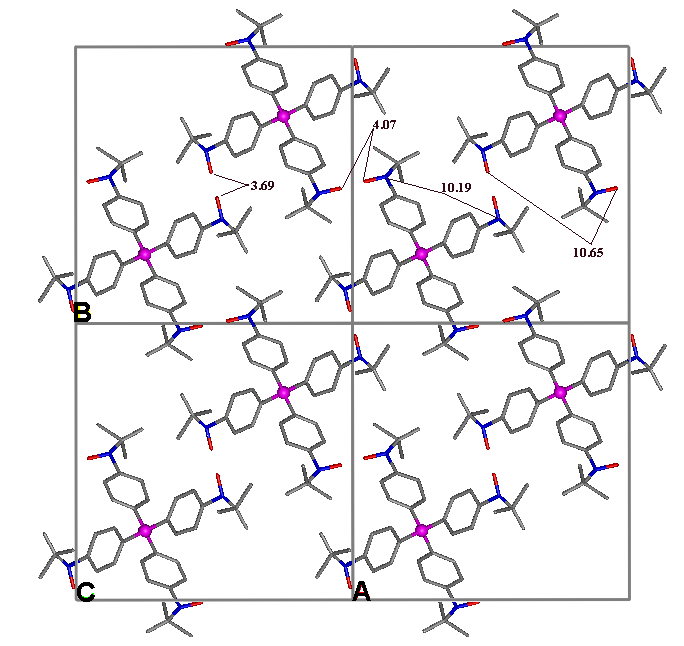
**

**Figure S7**. Crystal packing in **2**, showing closest NOON contacts in angstroms. The actual Ph-NO group torsions are disordered in the lattice, so the contacts are not completely regular.


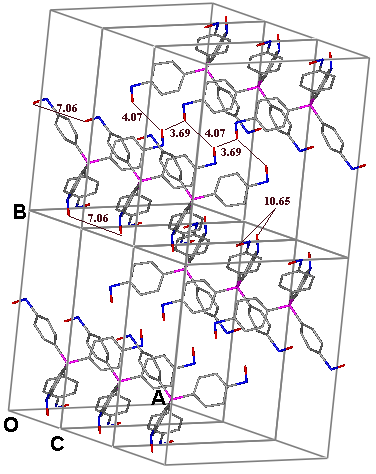


Crystal analysis for **2**: Analysis was carried out on an Nonius KappaCCD using Mo K radiation,  = 0.71073 Å, T = 298 K. Red needle 0.15×0.20×0.65 mm. The basic space group is tetragonal, P42/n (No. 86), *a* = 16.661(2), *b* = 16.661(2), *c* = 7.0586(9) Å, *Z* = 2. N = 1075 were reflections measured using  scans at 4.1 <  < 20. The structure was solved by direct methods and refined on F2 with a full matrix least squares using SHELXTL97 with 54 parameters; R = 0.246, wR= 0.218. The Ph-NO torsion is disordered in the crystal (not shown in the representations on the previous page), and we were not able to obtain higher refinement factors in multiple efforts.

Selected Molecular Geometry Parameters for **4**

| r Si-C(4) | 1.84 Å |
| --- | --- |
| r NO····N(O) (intra) | >9.2* |
| r NO····(N)O (inter) | >3.7* |
| 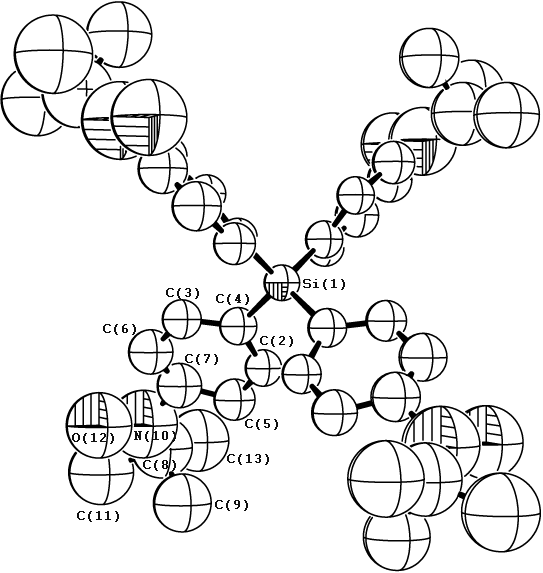O(12)N(10)—C(7)C(5) [Ph-NO torsion] | 22.9°, 22.9 + 180° |

*Conformer dependent within lattice.

**Figure S8.** T versus T plot for **2** (data corrected for diamagnetic and temperature independent contributions.

## **
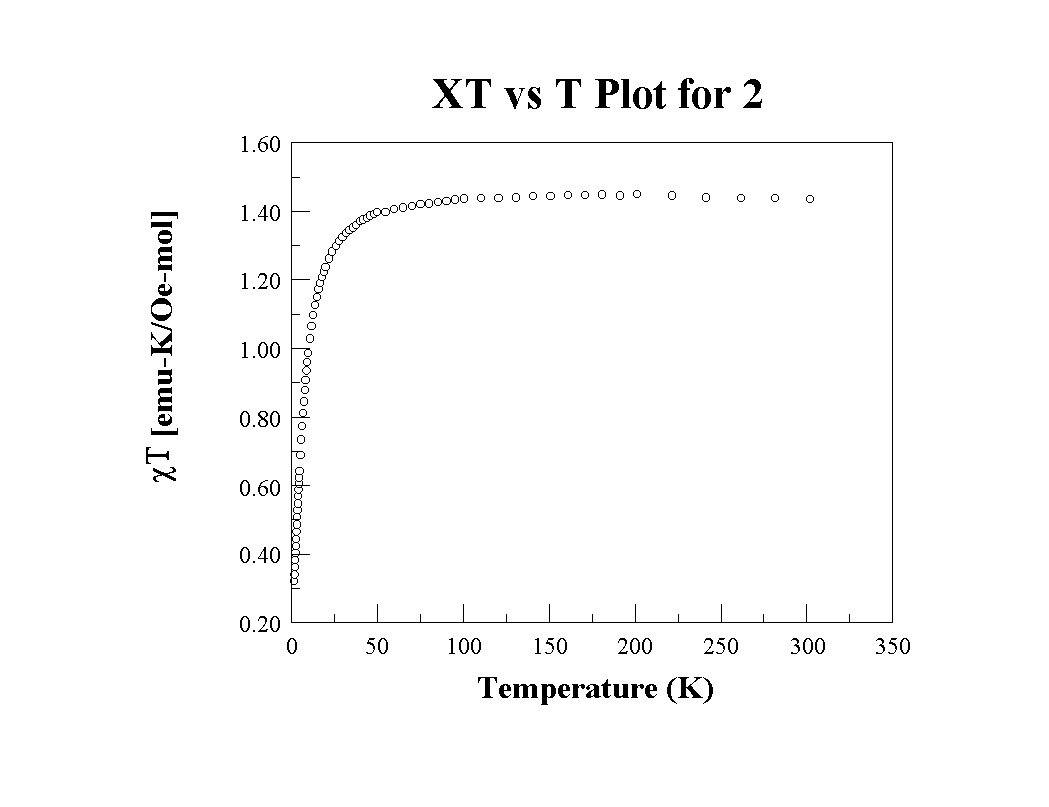
**

## Output from Gaussian 98 spin density computation for monoradical model for 2


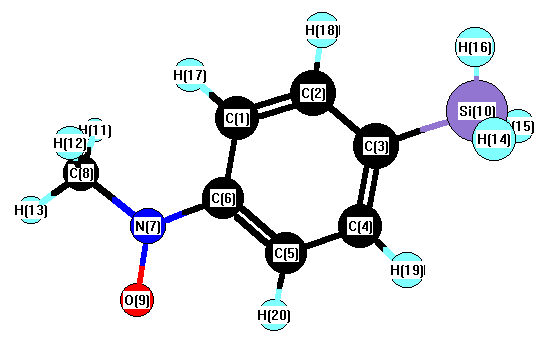
Total atomic spin densities:

1

1 C 0.127797

2 C -0.069276

3 C 0.126599

4 C -0.067643

5 C 0.124236

6 C -0.101998

7 N 0.343224

8 C -0.029891

9 O 0.516757

10 Si -0.004168

11 H 0.016066

12 H 0.016013

13 H -0.000057

14 H 0.004177

15 H 0.005143

16 H -0.000076

17 H -0.005864

18 H 0.002638

19 H 0.002617

20 H -0.006294

Sum of Mulliken spin densities= 1.00000

1\1\GINC-GROND\FOpt\UB3LYP\6-31G(d)\C7H10N1O1Si1(2)\LAHTI\28-Nov-2000\

0\\#P UB3LYP/6-31G* GFINPUT IOP(6/7=3) TEST OPT\\H3Si-Ph-NO-CH3 optimi

zation\\0,2\C,-1.1891440493,-0.0444965903,-0.4063793152\C,-0.709552066

6,-1.3343802578,-0.1882351915\C,0.5969163715,-1.5729750251,0.271084927

3\C,1.4136922379,-0.4471011929,0.5081332171\C,0.9598127744,0.846353729

6,0.2987703368\C,-0.3525896531,1.0580137157,-0.1630929903\N,-0.7957135

321,2.3752864429,-0.3692187485\C,-2.1494327035,2.6681908544,-0.8482186

19\O,-0.0177098262,3.3679814024,-0.1406320834\Si,1.2227849363,-3.32056

97071,0.5493007134\H,-2.9023825539,2.2903106589,-0.1473382811\H,-2.320

6647947,2.2207036685,-1.8338031991\H,-2.2155810267,3.7525040128,-0.915

7775296\H,1.7344439058,-3.498320354,1.9366923174\H,2.334391842,-3.6632

38671,-0.3815428986\H,0.1041392244,-4.2751823867,0.3224067427\H,-2.204

6636777,0.0932731762,-0.7609286762\H,-1.3764999975,-2.1710559911,-0.38

20404178\H,2.4320918575,-0.5818053625,0.8672302922\H,1.5891919793,1.70

8299428,0.4821053791\\Version=SGI-G98RevA.3\HF=-692.1596327\S2=0.76187

3\S2-1=0.\S2A=0.750103\RMSD=6.307e-09\RMSF=1.680e-06\Dipole=-0.9085892

,-0.3090494,-0.3003341\PG=C01 [X(C7H10N1O1Si1)]\\@

**Output from Gaussian 98 spin density computation for triplet state diradical model for 2**

Total atomic spin densities:

1

1 Si -0.000972 2 C 0.068705

3 C -0.040220 4 C 0.076119

5 C -0.070054 6 C 0.088461

7 C -0.044173 8 N 0.385293

9 O 0.558464 10 C 0.076925

11 C -0.051995 12 C 0.103347

13 C -0.079494 14 C 0.089982

15 C -0.050898 16 N 0.382857

17 O 0.552386 18 H 0.003675

19 H 0.001928 20 H 0.001696

21 H -0.003046 22 H -0.004507

23 H 0.001445 24 H -0.020971

25 H 0.001926 26 H -0.003649

27 H -0.004365 28 H 0.001536

29 H -0.020400

1\1\GINC-GROND\SP\UB3LYP\6-31G(d)\C12H12N2O2Si1(3)\LAHTI\13-Jun-2001\0

\\#P UB3LYP/6-31G* GFINPUT IOP(6/7=3) TEST SCF=DIRECT\\Biradical based

upon Yi SiNO4 xtl structure C-N bond lengths shortened to standard le

ngth\\0,3\Si,0,0.918488,2.020218,0.007217\C,0,1.571686,0.674408,1.0750

12\C,0,0.736694,0.172409,2.136017\C,0,1.106689,-0.985565,2.978012\C,0,

2.431641,-1.4386,2.618958\C,0,3.344696,-0.915573,1.772018\C,0,2.864685

,0.15242,0.906006\N,0,2.956467,-2.462036,3.521515\O,0,4.245224,-2.5101

32,3.7834\C,0,-0.427292,1.367416,-1.060974\C,0,-0.929291,2.201416,-2.1

21979\C,0,-2.087326,1.831451,-2.963882\C,0,-2.540314,0.5074,-2.604935\

C,0,-2.017181,-0.405594,-1.725067\C,0,-0.949295,0.074417,-0.891968\N,0

,-3.563751,-0.017395,-3.507431\O,0,-3.6118,-1.306122,-3.769318\H,0,0.4

32693,3.013382,0.780975\H,0,1.913666,2.501389,-0.767944\H,0,-0.22673,0

.669067,2.323303\H,0,0.46785,-1.439377,3.749954\H,0,4.246872,-1.220184

,1.7247\H,0,3.433243,0.50174,0.229538\H,0,2.292297,-3.156357,3.944931\

H,0,-0.421188,3.156372,-2.321655\H,0,-2.8349,2.41507,-3.025879\H,0,-2.

39769,-1.435242,-1.654251\H,0,-0.541138,-0.576523,-0.104782\H,0,-4.246

887,0.64917,-3.944931\\Version=SGI-G98RevA.3\HF=-1013.6538073\S2=2.016

016\S2-1=0.\S2A=2.00017\RMSD=2.477e-05\Dipole=-0.970913,0.9292686,0.32

24556\PG=C01 [X(C12H12N2O2Si1)]\\@


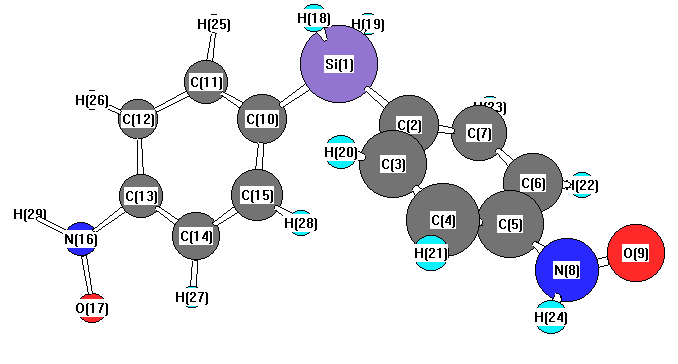


**Output from Gaussian 98 spin density computation for singlet state diradical model for 2**

Test job not archived.

1\1\GINC-GROND\SP\UB3LYP\6-31G(d)\C12H12N2O2Si1\LAHTI\06-Jul-2001\0\\#

P UB3LYP/6-31G* GFINPUT IOP(6/7=3) TEST SCF=DIRECT GUESS=(READ,MIX)\\B

iradical based upon Yi SiNO4 xtl structure C-N bond lengths shortened

to standard length\\0,1\Si,0,0.918488,2.020218,0.007217\C,0,1.571686,0

.674408,1.075012\C,0,0.736694,0.172409,2.136017\C,0,1.106689,-0.985565

,2.978012\C,0,2.431641,-1.4386,2.618958\C,0,3.344696,-0.915573,1.77201

8\C,0,2.864685,0.15242,0.906006\N,0,2.956467,-2.462036,3.521515\O,0,4.

245224,-2.510132,3.7834\C,0,-0.427292,1.367416,-1.060974\C,0,-0.929291

,2.201416,-2.121979\C,0,-2.087326,1.831451,-2.963882\C,0,-2.540314,0.5

074,-2.604935\C,0,-2.017181,-0.405594,-1.725067\C,0,-0.949295,0.074417

,-0.891968\N,0,-3.563751,-0.017395,-3.507431\O,0,-3.6118,-1.306122,-3.

769318\H,0,0.432693,3.013382,0.780975\H,0,1.913666,2.501389,-0.767944\

H,0,-0.22673,0.669067,2.323303\H,0,0.46785,-1.439377,3.749954\H,0,4.24

6872,-1.220184,1.7247\H,0,3.433243,0.50174,0.229538\H,0,2.292297,-3.15

6357,3.944931\H,0,-0.421188,3.156372,-2.321655\H,0,-2.8349,2.41507,-3.

025879\H,0,-2.39769,-1.435242,-1.654251\H,0,-0.541138,-0.576523,-0.104

782\H,0,-4.246887,0.64917,-3.944931\\Version=SGI-G98RevA.3\HF=-1013.65

3808\S2=1.016951\S2-1=0.\S2A=0.137193\RMSD=2.708e-05\Dipole=-0.9410677

,0.9175438,0.3620015\PG=C01 [X(C12H12N2O2Si1)]\\@


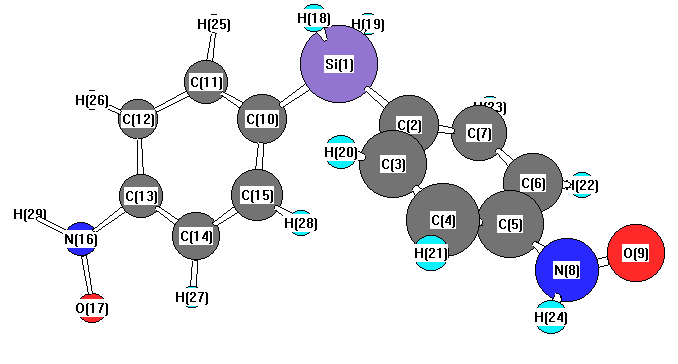

Supplement: b107430j.doc [file b107430j.doc]
